# Supplementary material for: Rationally designed synthesis of bright Cu–Ga–Zn–Se-based nanocrystals for efficient green quantum-dot light-emitting diodes
Source: Royal Society of Chemistry journal article supplement (doi:10.1039/d4tc00349g), 2024-01-01
Supplement: d4tc00349g1.pdf [file d4tc00349g1.pdf]

## Supporting Information

Rationally Designed Synthesis of Bright Cu-Ga-Zn-Se-based Nanocrystals  
for Efficient Green Light-Emitting Diodes

Ruixin Sun,<sup>‡a</sup> Jinxing Zhao,<sup>‡a</sup> Ouyang Lin,<sup>a</sup> Yu Li,<sup>a</sup> Xiulin Xie,<sup>a</sup> Wentao Niu,<sup>a</sup> Zhe Yin,<sup>a\*</sup> and Aiwei Tang<sup>a\*</sup>

<sup>a</sup> Key Laboratory of Luminescence and Optical Information, Ministry of Education, School of Physical Science and Engineering, Beijing Jiaotong University, Beijing 100044, China

<sup>‡</sup> These authors contributed equally to this work.

E-mail: [awtang@bjtu.edu.cn](mailto:awtang@bjtu.edu.cn); [yinzhe@bjtu.edu.cn](mailto:yinzhe@bjtu.edu.cn)

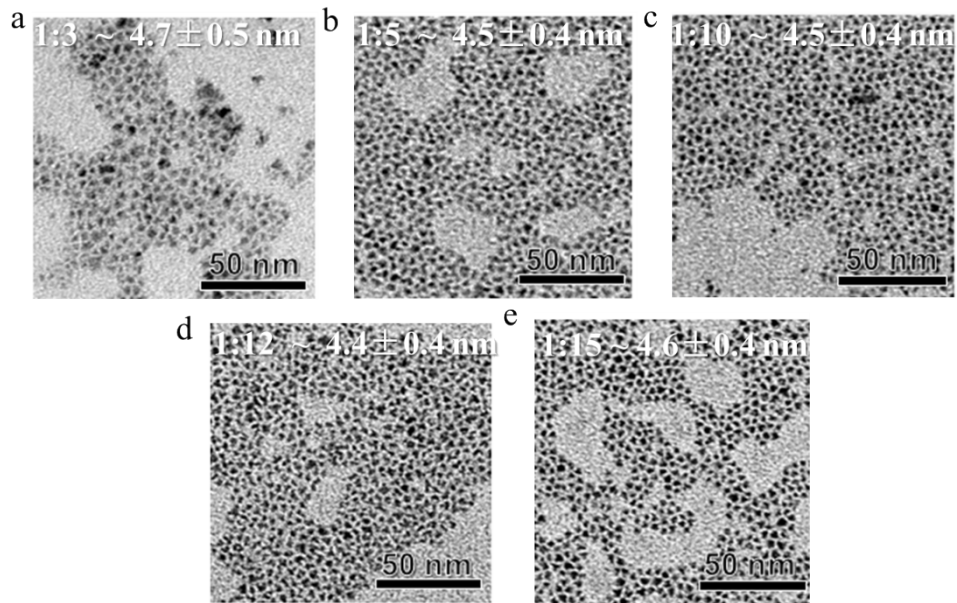

**Fig. S1** TEM images of CGZSe/ZnS NCs prepared under various Cu:Ga ratios. (a) 1:3, (b) 1:5, (c) 1:10, (d) 1:12, (e) 1:15.

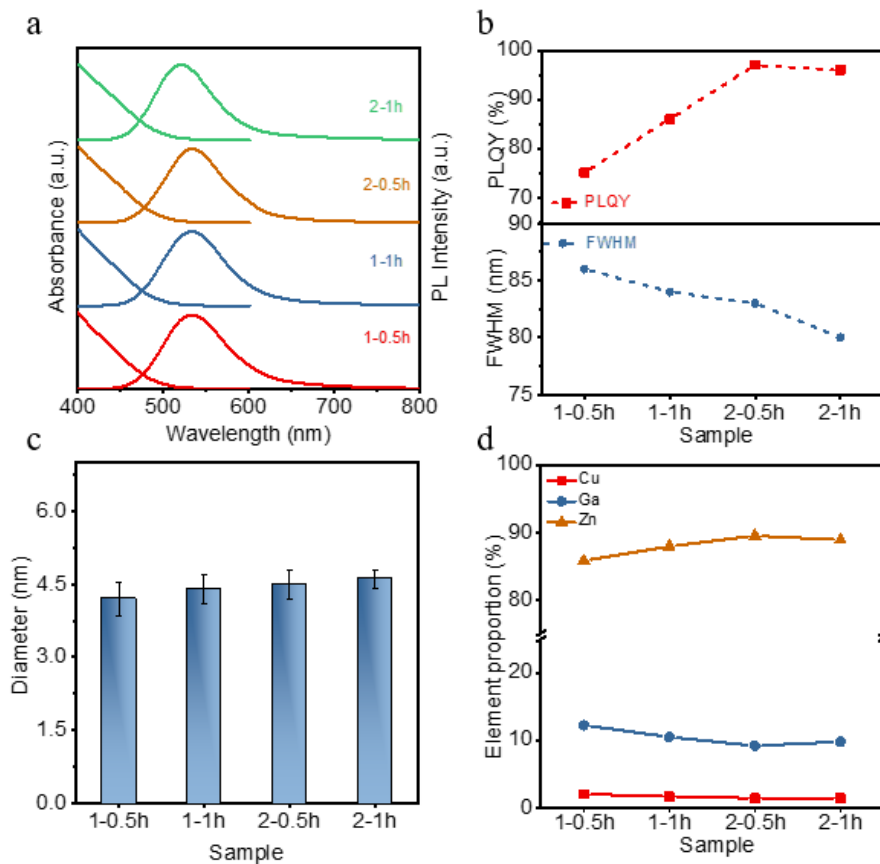

**Fig. S2** Evolution of the (a) absorption and PL spectra, (b) Comparison of PLQY and FWHM, (c) size distributions, (d) and ICP-MS characterization of CGZSe/ZnS NCs.

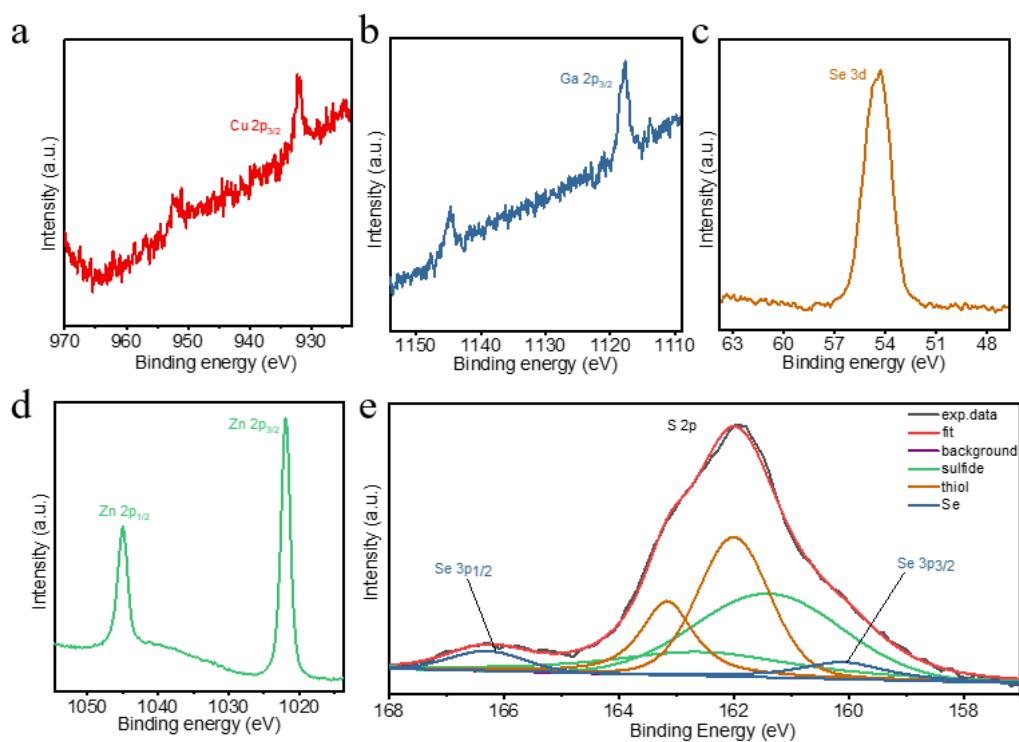

**Fig. S3** XPS results of CGZSe/ZnS NCs (a) Cu 2p, (b) Ga 2p, (c) Se, (d) Zn 2p, (e) S 2p and Se 3p.

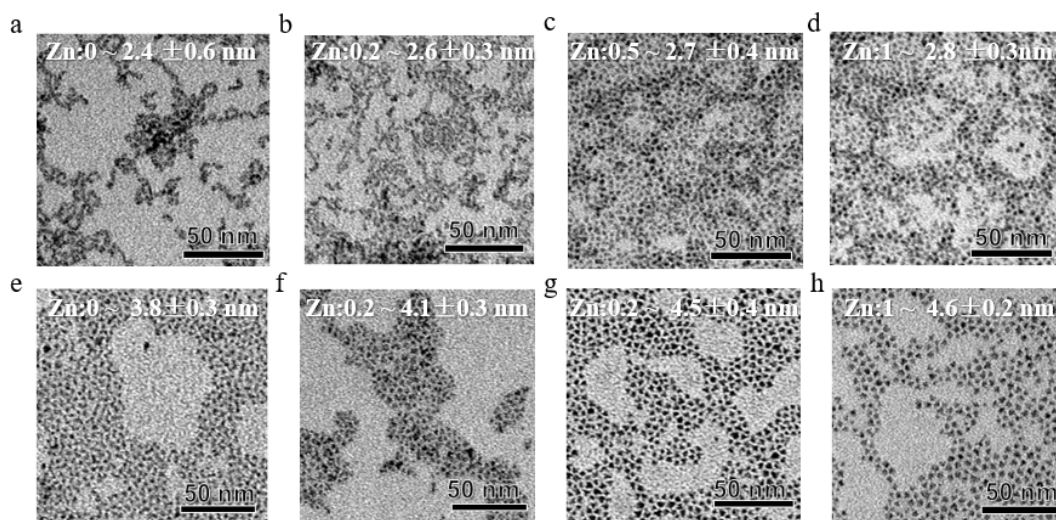

**Fig. S4** TEM images of CGZSe NCs with different Zn. (a) 0 mmol, (b) 0.2 mmol, (c) 0.5 mmol, (d) 1.0 mmol and corresponding CGZSe/ZnS NCs, (e) 0 mmol, (f) 0.2 mmol, (g) 0.5 mmol, (h) 1.0 mmol.

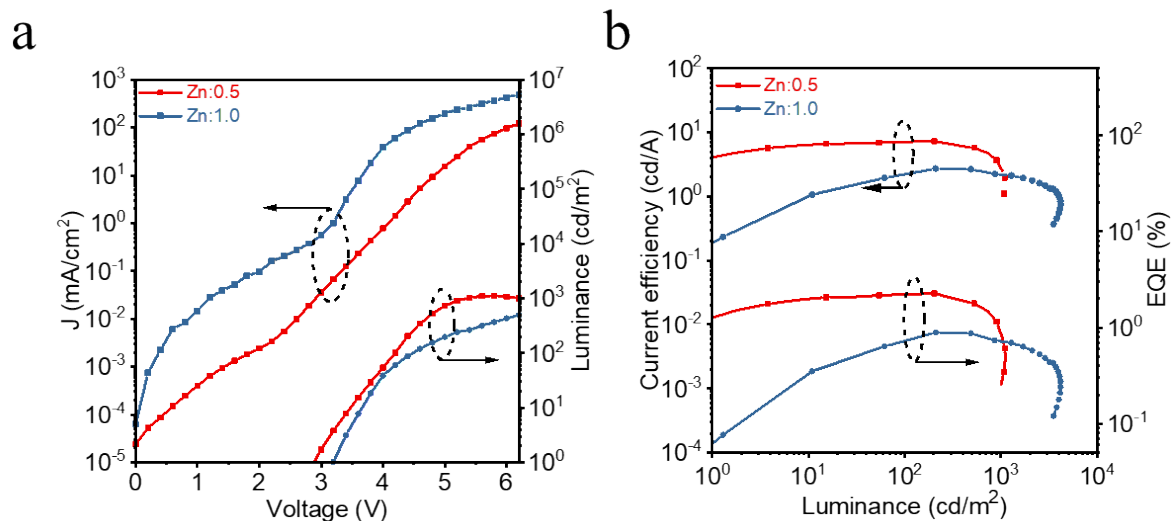

**Fig. S5** (a) Current density - luminance - voltage characteristic curves, (b) External quantum efficiency and current efficiency vary with luminance curves of QLEDs

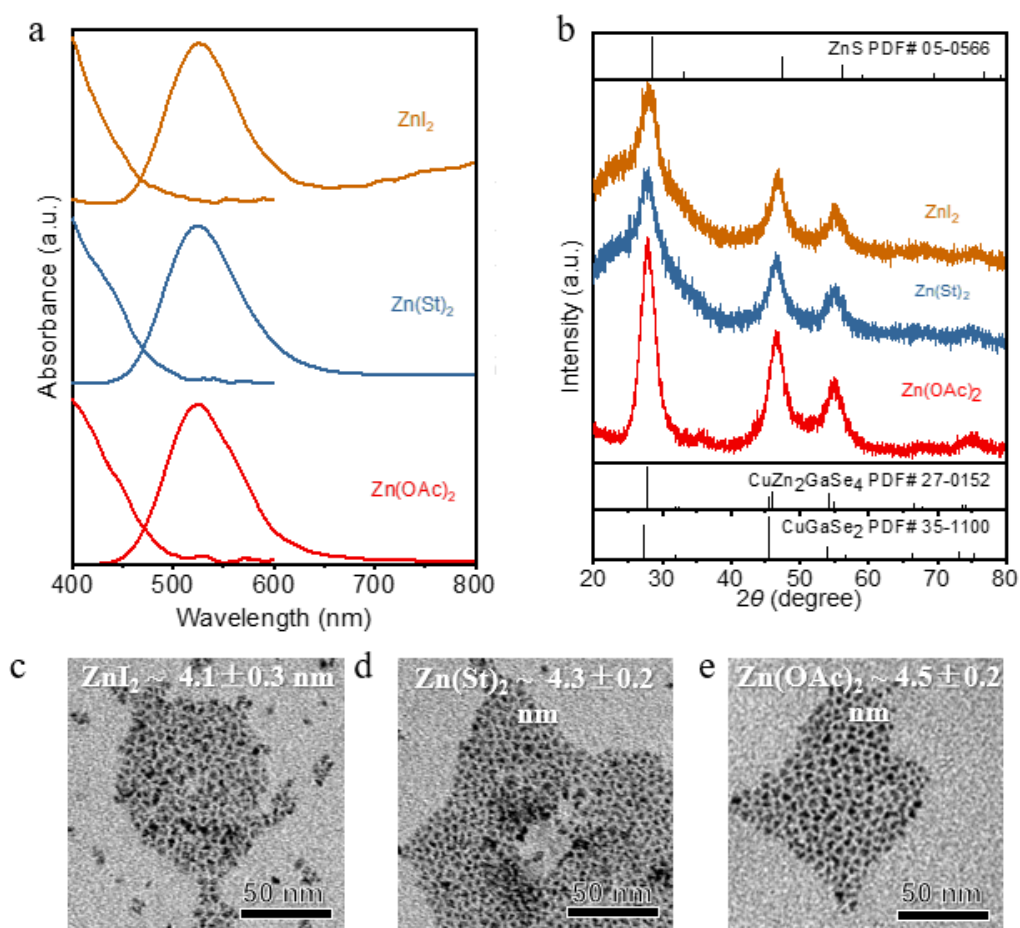

constructed from CGZSe/ZnS NCs with different Zn.

**Fig. S6** (a) Absorption and PL spectra ( $\lambda_{\text{ex}}=325$  nm), (b) XRD patterns and TEM images

of CGZSe/ZnS with different kinds of Zn source. (c)  $\text{ZnI}_2$ , (d)  $\text{Zn}(\text{St})_2$ , (e)  $\text{Zn}(\text{OAc})_2$ .

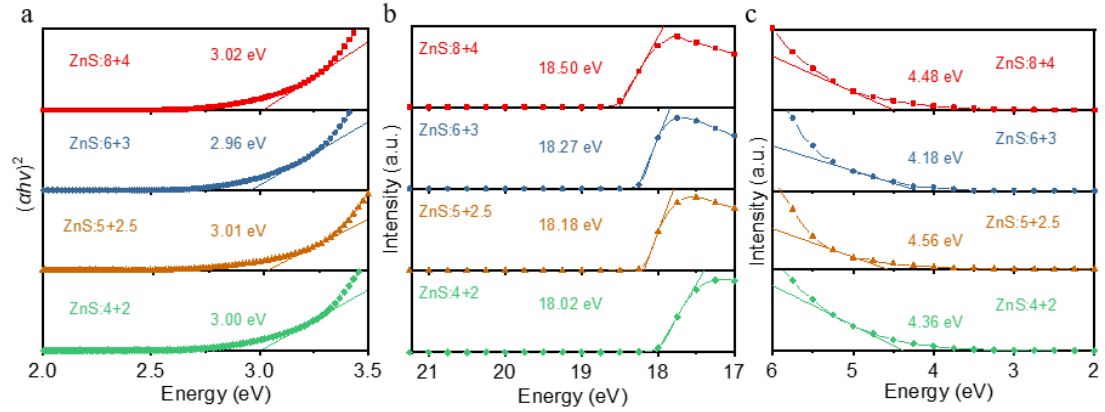

**Fig. S7** (a) Band gaps of CGZSe/ZnS NCs. UPS spectra of the (b) high-binding energy electron cutoff, (c) valence-band edge regions with different Zn injection amounts.

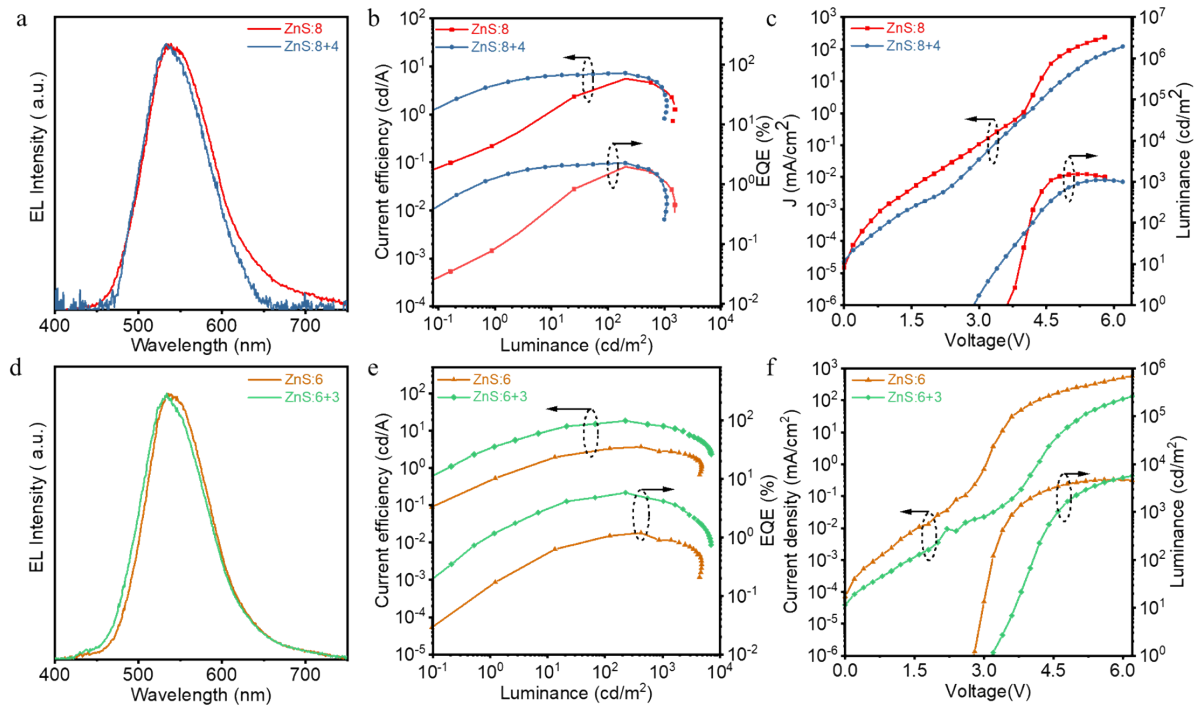

**Fig. S8** CGZSe/ZnS NCs with different Zn component as EML for QLEDs. (a)(d) EL spectra, (b)(e) current efficiency and EQE, (c)(f)  $J$ - $L$ - $V$  characteristic.

**Table S1.** Element atomic ratio (ICP analysis) of CGZSe/ZnS NCs

| Sample        | Element   | 1-0.5h | 1-1h  | 2-0.5h | 2-1h  |
|---------------|-----------|--------|-------|--------|-------|
| CGZSe/ZnS NCs | <b>Cu</b> | 2.0%   | 1.65% | 1.5%   | 1.4%  |
|               | <b>Ga</b> | 12.2%  | 10.5% | 9.2%   | 9.7%  |
|               | <b>Zn</b> | 85.8%  | 87.9% | 89.3%  | 88.9% |

**Table S2.** PL decay components for CGZSe/ZnS NCs

| Sample        | $\tau_1/\text{ns}$ | $\alpha_1$ | $\tau_2/\text{ns}$ | $\alpha_2$ | $\tau_3/\text{ns}$ | $\alpha_3$ | $\tau_{\text{avg}}/\text{ns}$ |
|---------------|--------------------|------------|--------------------|------------|--------------------|------------|-------------------------------|
| <b>Zn:0</b>   | 129.8              | 22.5%      | 43.3               | 20.6%      | 940.1              | 56.9%      | 325.2                         |
| <b>Zn:0.2</b> | 21.3               | 2.6%       | 131.1              | 52.1%      | 436.6              | 45.3%      | 246.2                         |
| <b>Zn:0.5</b> | 17.8               | 1.6%       | 154.6              | 46.6%      | 476.4              | 51.8%      | 318.5                         |
| <b>Zn:1</b>   | 29.2               | 0.7%       | 202.6              | 43.7%      | 580.0              | 55.6%      | 398.4                         |

**Table S3.** Performance of the green-emitting CGZSe/ZnS NCs-based QLEDs

| Sample           | EL peak<br>(nm) | EQE <sub>max</sub><br>(%) | L <sub>max</sub><br>(cd/m <sup>2</sup> ) | CE (cd/A) |
|------------------|-----------------|---------------------------|------------------------------------------|-----------|
| <b>ZnS:8+4</b>   | 533             | 2.3                       | 1103                                     | 7.2       |
| <b>ZnS:6+3</b>   | 534             | 5.8                       | 7016                                     | 18.4      |
| <b>ZnS:5+2.5</b> | 534             | 0.6                       | 2615                                     | 1.9       |
| <b>ZnS:4+2</b>   | 534             | 0.7                       | 2287                                     | 2.2       |

**Table S4.** Performance of the green-emitting CGZSe/ZnS NCs-based QLEDs

| <b>Sample</b>  | <b>EL peak<br/>(nm)</b> | <b>EQE<sub>max</sub><br/>(%)</b> | <b>L<sub>max</sub><br/>(cd/m<sup>2</sup>)</b> | <b>CE (cd/A)</b> |
|----------------|-------------------------|----------------------------------|-----------------------------------------------|------------------|
| <b>ZnS:8+4</b> | 533                     | 2.3                              | 1103                                          | 7.2              |
| <b>ZnS:8</b>   | 539                     | 1.9                              | 1540                                          | 5.5              |
| <b>ZnS:6+3</b> | 534                     | 5.8                              | 7016                                          | 18.4             |
| <b>ZnS:6</b>   | 534                     | 1.2                              | 4810                                          | 3.7              |
